# Supplementary material
Source: PubMed Central journal article supplement (PMC5600465)
Supplement: NIHMS904637-supplement-Supplemental_data.pdf [file NIHMS904637-supplement-Supplemental_data.pdf]

**A**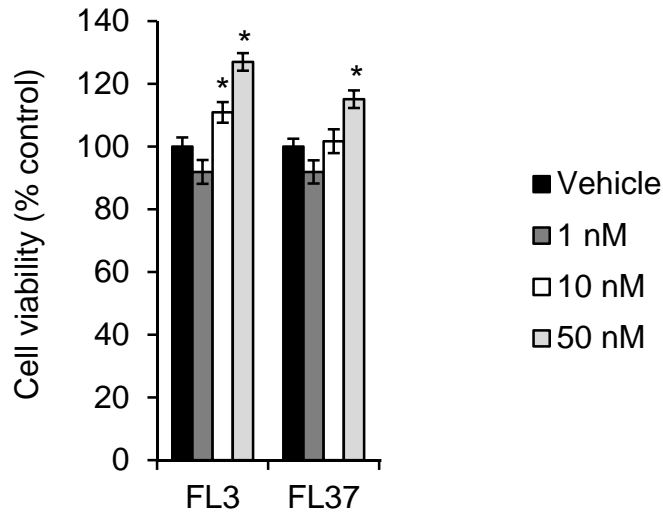**B**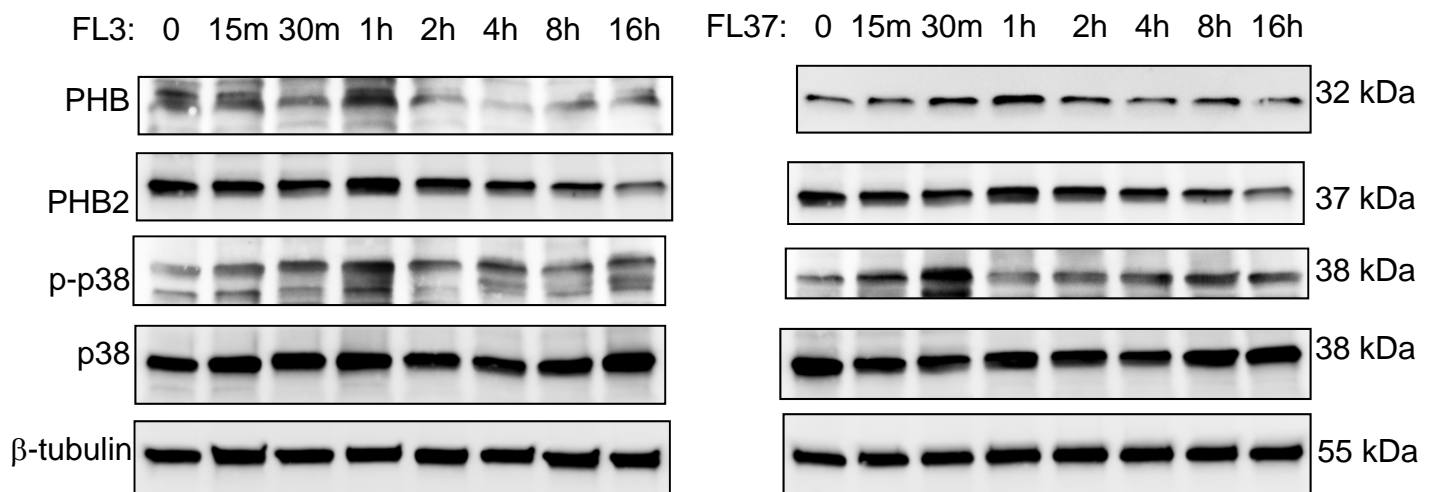

**Supplemental Figure 1. FL3 and FL37 increase cell viability and increase protein expression of known flavagline ligands PHB and PHB2 in IEC-6 cells.** (A) Cell viability using LDH assay of cells treated with FL3 or FL37 for 16 hr.  $n = 8$  per treatment.  $*P < 0.05$  vs. vehicle. (B) Polarized IEC-6 cells were treated with 10 nM FL3 or FL37 for increasing time. Representative western blots are shown for PHB, PHB2, phospho-p38, total p38 and  $\beta$ -tubulin (loading control).

**A**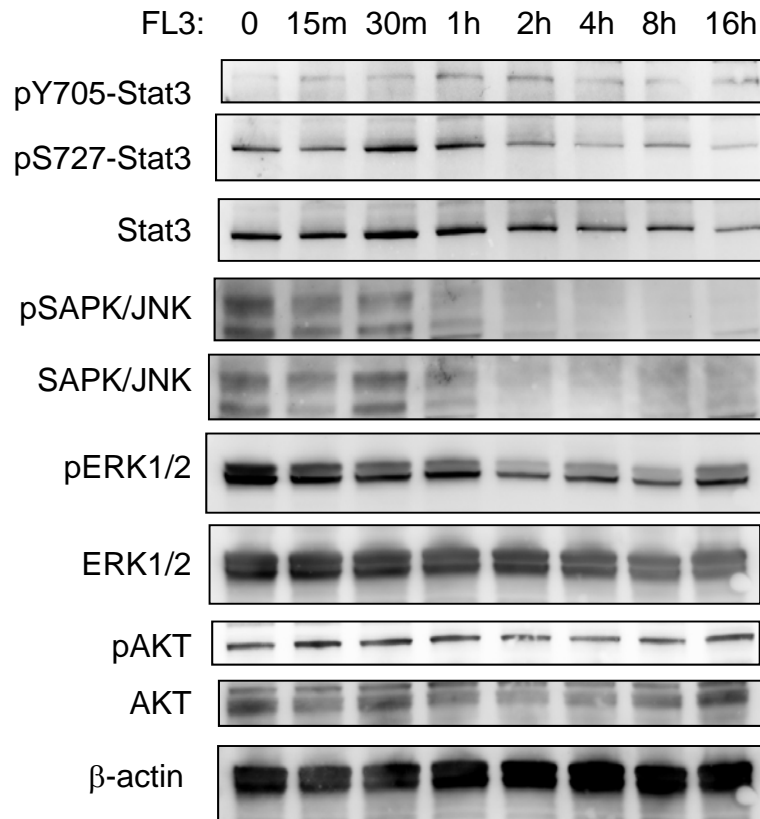**B**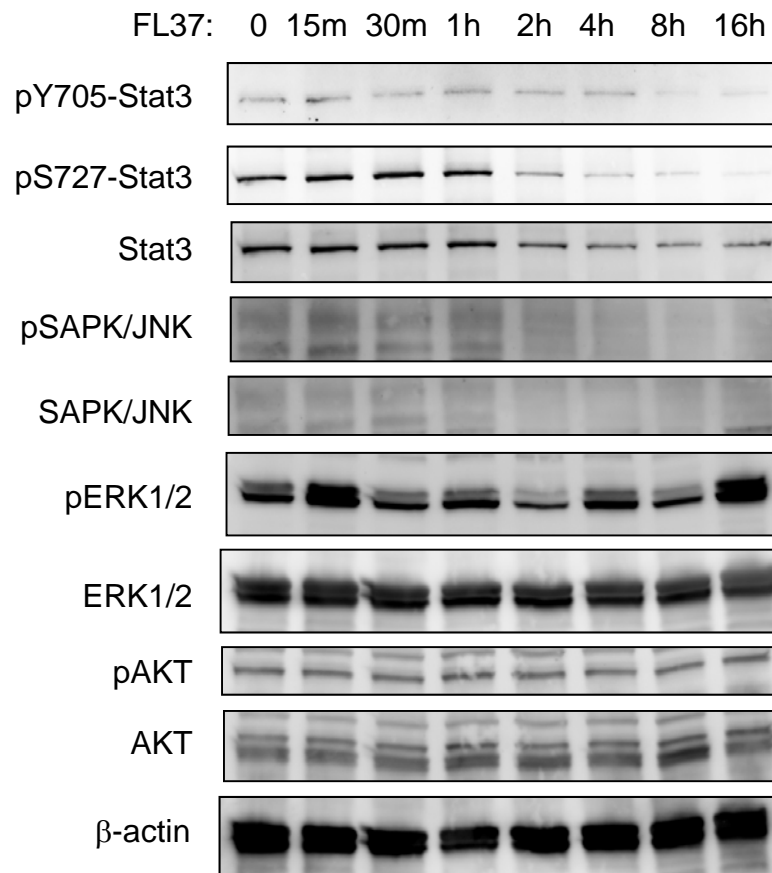

**Supplemental Figure 2. FL3 and FL37 do not induce Stat3, SAPK/JNK, ERK, or AKT activation in Caco2-BBE cells.** Cells were treated with 10 nM FL3 (A) or FL37 (B) for increasing time. Representative western blots are shown.

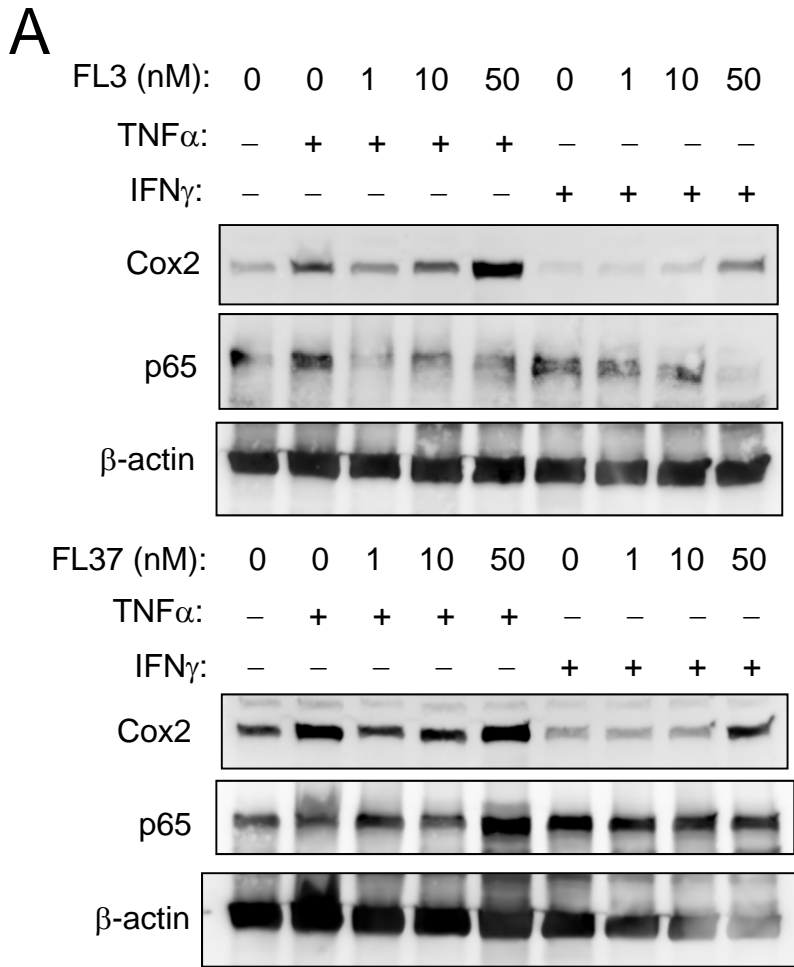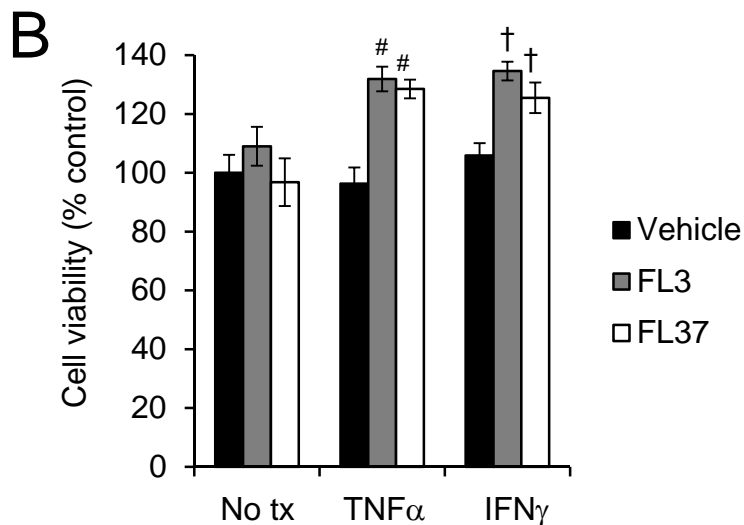

**Supplemental Figure 3. Pretreatment with FL3 or FL37 decreases TNF $\alpha$ - induced expression of NF $\kappa$ B p65 and Cox2 and enhances IEC-6 cell viability during TNF $\alpha$  or IFN $\gamma$  treatment.** (A) Cells were pretreated with increasing concentrations of FL3 or FL37 for 1 hour, followed by treatment with 10 ng/ml TNF $\alpha$  or 50 ng/ml IFN $\gamma$  for 16 hr. Total protein was isolated for western blotting for expression of NF $\kappa$ B p65, Cox2, and  $\beta$ -actin (loading control). (B) Cells were pretreated with 10 nM FL3 or FL37 for 1 hour followed by treatment with 10 ng/ml TNF $\alpha$  or 50 ng/ml IFN $\gamma$  for 16 hr. Cell viability was measured using the LDH assay. \* $P$  < 0.05 vs. vehicle. # $P$  < 0.05 vs. TNF $\alpha$  + vehicle; † $P$  < 0.05 vs. IFN $\gamma$  + vehicle. n = 8 per treatment.

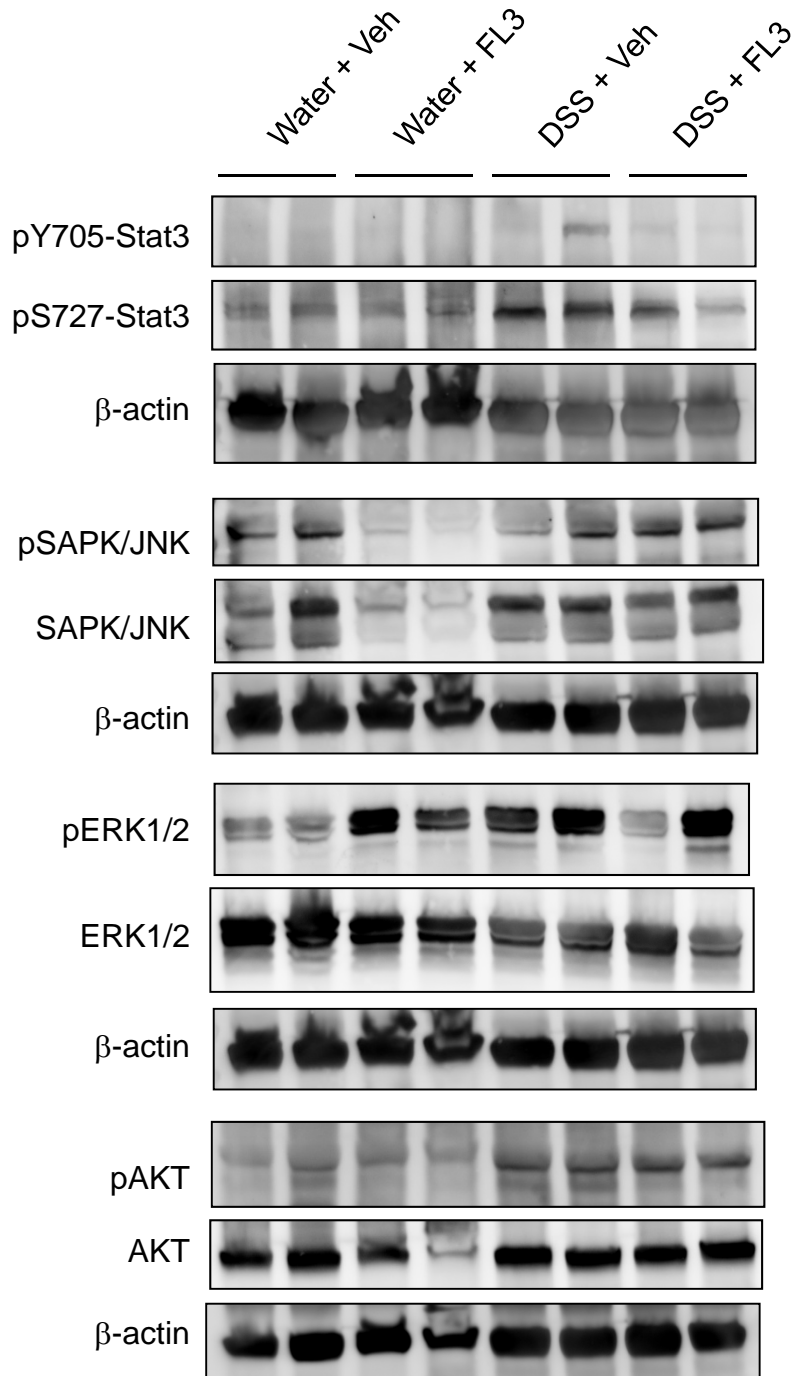

**Supplemental Figure 4. In vivo administration of FL3 does not induce Stat3, SAPK/JNK, ERK, or AKT activation in the colon during DSS colitis.** Representative western blots of total protein isolated from whole colon on day 6 of DSS colitis.
